# Supplementary material for: Coordination of humoral immune factors dictates compatibility between Schistosoma mansoni and Biomphalaria glabrata
Source: eLife. 2020 Jan 9;9:e51708. doi: 10.7554/eLife.51708 (PMC6970513; doi:10.7554/eLife.51708)
Supplement: Figure 4—source data 1. [file elife-51708-fig4-data1.xls]

## Sheet: FREP3 Plasma Study
	Media Alone	Media Alone	Media Alone	Media Alone	Media Alone	Media Alone	Media Alone	Media Alone	Media Alone	Media Alone	Media + M-line plasma	Media + M-line plasma	Media + M-line plasma	Media + M-line plasma	Media + M-line plasma	Media + M-line plasma	Media + M-line plasma	Media + M-line plasma	Media + M-line plasma	Media + M-line plasma	FREP3 + Media + M-line Plasma	FREP3 + Media + M-line Plasma	FREP3 + Media + M-line Plasma	FREP3 + Media + M-line Plasma	FREP3 + Media + M-line Plasma	FREP3 + Media + M-line Plasma	FREP3 + Media + M-line Plasma	FREP3 + Media + M-line Plasma	FREP3 + Media + M-line Plasma	FREP3 + Media + M-line Plasma	TEP + Media + M-line Plasma	TEP + Media + M-line Plasma	TEP + Media + M-line Plasma	TEP + Media + M-line Plasma	TEP + Media + M-line Plasma	TEP + Media + M-line Plasma	TEP + Media + M-line Plasma	TEP + Media + M-line Plasma	TEP + Media + M-line Plasma	TEP + Media + M-line Plasma	FREP3 + TEP + Media + M-line Plasma	FREP3 + TEP + Media + M-line Plasma	FREP3 + TEP + Media + M-line Plasma	FREP3 + TEP + Media + M-line Plasma	FREP3 + TEP + Media + M-line Plasma	FREP3 + TEP + Media + M-line Plasma	FREP3 + TEP + Media + M-line Plasma	FREP3 + TEP + Media + M-line Plasma	FREP3 + TEP + Media + M-line Plasma
3 hours	0	0	0	0	0	0	0	0	0	0	0	0	0	0	0	0	0	0	0	0	0	0	0	0	1	0	1	1	0	1	0	0	0	0	1	0	0	1	0	0	0	0	0	0	1	1	0	1	0
6 hours	1	0	0	0	1	2	0	0	0	1	0	1	0	1	0	0	0	1	0	0	1	0	0	1	1	0	2	1	0	1	0	1	0	0	1	1	0	1	0	0	1	0	0	1	2	1	0	1	1
12 hours	1	0	0	1	1	2	1	0	0	2	0	1	0	1	0	0	0	1	1	0	1	1	0	2	1	0	2	2	0	1	1	2	1	1	2	1	0	1	0	1	3	1	2	2	3	1	0	3	2
24 hours	1	0	0	1	1	2	1	0	0	2	0	2	1	1	0	0	0	2	1	0	2	3	1	4	2	0	4	3	1	2	2	2	3	1	2	2	0	1	0	2	5	3	5	4	4	5	1	4	4
36 hours	2	1	0	1	1	2	1	1	0	2	0	2	2	1	0	0	0	2	1	0	3	3	1	4	3	1	5	3	2	2	2	2	4	2	3	3	1	2	2	3	6	4	6	5	5	5	2	4	5
48 hours	2	1	1	1	2	2	1	1	0	2	1	4	3	2	1	0	1	3	4	1	4	5	2	4	5	1	6	3	2	4	2	4	4	3	3	4	1	3	4	4	7	5	6	6	7	7	2	5	5
[truncated: 11 more columns]

## Sheet: ROS Study
		M-line haemocytes+vehicle	M-line haemocytes+vehicle	M-line haemocytes+vehicle	M-line haemocytes+vehicle	M-line haemocytes+vehicle	M-line haemocytes+vehicle	BS-90 haemocytes+vehicle	BS-90 haemocytes+vehicle	BS-90 haemocytes+vehicle	BS-90 haemocytes+vehicle	BS-90 haemocytes+vehicle	BS-90 haemocytes+vehicle	BS-90 haemocytes+DPI	BS-90 haemocytes+DPI	BS-90 haemocytes+DPI	BS-90 haemocytes+DPI	BS-90 haemocytes+DPI	BS-90 haemocytes+DPI	BS-90 haemocytes+NAC	BS-90 haemocytes+NAC	BS-90 haemocytes+NAC	BS-90 haemocytes+NAC	BS-90 haemocytes+NAC	BS-90 haemocytes+NAC	M-line +FREP3+TEP+vehicle	M-line +FREP3+TEP+vehicle	M-line +FREP3+TEP+vehicle	M-line +FREP3+TEP+vehicle	M-line +FREP3+TEP+vehicle	M-line +FREP3+TEP+vehicle	M-line +FREP3+TEP+NAC	M-line +FREP3+TEP+NAC	M-line +FREP3+TEP+NAC	M-line +FREP3+TEP+NAC	M-line +FREP3+TEP+NAC	M-line +FREP3+TEP+NAC	M-line +FREP3+TEP+DPI	M-line +FREP3+TEP+DPI	M-line +FREP3+TEP+DPI	M-line +FREP3+TEP+DPI	M-line +FREP3+TEP+DPI	M-line +FREP3+TEP+DPI
Dead sporocysts/10	3 hours	0	0	0	0	1	0	0	0	1	0	1	0	0	1	0	0	1	0	0	0	1	1	0	1	1	1	0	0	0	0	0	0	0	0	0	1	1	1	0	1	0	1
	6 hours	0	1	0	0	1	1	0	1	1	1	2	1	0	1	1	1	1	0	0	1	1	1	0	2	2	1	1	0	1	1	1	0	1	0	2	1	1	1	0	2	0	1
	12 hours	0	1	0	0	1	1	2	3	3	2	3	4	1	1	2	2	2	2	1	2	3	2	0	3	3	3	2	1	2	3	2	1	2	0	2	1	2	2	1	2	1	2
	24 hours	1	2	0	1	2	3	6	7	6	6	6	6	3	4	4	5	3	4	1	3	4	2	1	3	5	5	4	4	4	5	3	3	2	1	3	2	2	3	2	3	1	2
	36 hours	1	2	1	2	2	3	8	8	8	7	7	8	4	4	6	5	4	5	2	3	4	4	2	5	7	6	6	5	5	6	4	3	2	2	4	3	4	4	3	3	3	4
	48 hours	2	2	2	3	3	3	9	9	10	8	8	9	4	6	6	7	5	6	4	5	5	6	2	5	8	7	8	6	5	6	4	5	3	3	5	4	6	5	4	5	5	6

## Sheet: Catalase ROS Study
		FREP3 + TEP + Media + M-line Plasma	FREP3 + TEP + Media + M-line Plasma	FREP3 + TEP + Media + M-line Plasma	FREP3 + TEP + Media + M-line Plasma	FREP3 + TEP + Media + M-line Plasma	FREP3 + TEP + Media + M-line Plasma	FREP3 + TEP + Media + M-line Plasma + catalase	FREP3 + TEP + Media + M-line Plasma + catalase	FREP3 + TEP + Media + M-line Plasma + catalase	FREP3 + TEP + Media + M-line Plasma + catalase	FREP3 + TEP + Media + M-line Plasma + catalase	FREP3 + TEP + Media + M-line Plasma + catalase	Media + BS-90 Plasma	Media + BS-90 Plasma	Media + BS-90 Plasma	Media + BS-90 Plasma	Media + BS-90 Plasma	Media + BS-90 Plasma	Media + BS-90 Plasma + catalase	Media + BS-90 Plasma + catalase	Media + BS-90 Plasma + catalase	Media + BS-90 Plasma + catalase	Media + BS-90 Plasma + catalase	Media + BS-90 Plasma + catalase	BS-90 haemocytes	BS-90 haemocytes	BS-90 haemocytes	BS-90 haemocytes	BS-90 haemocytes	BS-90 haemocytes	BS-90 haemocytes + catalase	BS-90 haemocytes + catalase	BS-90 haemocytes + catalase	BS-90 haemocytes + catalase	BS-90 haemocytes + catalase	BS-90 haemocytes + catalase
Dead sporocysts/10	3 hours	0	1	0	0	1	0	0	0	1	0	0	1	1	0	1	0	1	1	0	1	1	0	1	0	1	0	1	0	1	0	0	1	0	0	1	0
	6 hours	0	2	2	0	2	1	1	0	3	1	0	3	2	1	1	1	1	2	1	2	2	1	1	1	2	1	3	1	2	2	1	1	1	1	2	1
	12 hours	1	4	3	1	2	2	2	2	4	2	2	4	4	3	2	2	1	4	3	4	4	2	2	1	4	2	4	3	4	3	2	2	3	2	3	2
	24 hours	3	6	5	2	5	4	4	3	6	4	3	6	6	6	4	3	3	6	4	5	6	2	5	3	6	5	6	5	5	5	4	3	4	2	5	2
	36 hours	5	7	6	4	6	4	4	4	7	5	5	8	8	7	6	4	6	6	6	7	6	4	6	4	8	8	7	8	7	9	4	4	4	5	5	4
	48 hours	6	8	6	5	8	6	6	5	8	7	6	8	9	8	7	7	9	7	7	8	8	5	7	6	9	8	9	10	8	9	5	6	5	5	6	5

## Sheet: FREP3 Haemocyte Study
		Media Alone	Media Alone	Media Alone	Media Alone	Media Alone	Media Alone	Media Alone	Media Alone	Media Alone	Media Alone	M-line haemocytes	M-line haemocytes	M-line haemocytes	M-line haemocytes	M-line haemocytes	M-line haemocytes	M-line haemocytes	M-line haemocytes	M-line haemocytes	M-line haemocytes	M-line haemocytes+TEP	M-line haemocytes+TEP	M-line haemocytes+TEP	M-line haemocytes+TEP	M-line haemocytes+TEP	M-line haemocytes+TEP	M-line haemocytes+TEP	M-line haemocytes+TEP	M-line haemocytes+TEP	M-line haemocytes+TEP	M-line haemocytes+FREP3	M-line haemocytes+FREP3	M-line haemocytes+FREP3	M-line haemocytes+FREP3	M-line haemocytes+FREP3	M-line haemocytes+FREP3	M-line haemocytes+FREP3	M-line haemocytes+FREP3	M-line haemocytes+FREP3	M-line haemocytes+FREP3	M-line haemocytes+TEP+FREP3	M-line haemocytes+TEP+FREP3	M-line haemocytes+TEP+FREP3	M-line haemocytes+TEP+FREP3	M-line haemocytes+TEP+FREP3	M-line haemocytes+TEP+FREP3	M-line haemocytes+TEP+FREP3	M-line haemocytes+TEP+FREP3
Dead sporocysts/10	3 hours	0	0	0	0	0	0	0	0	0	0	0	0	0	1	0	1	0	0	0	1	0	0	1	1	0	1	1	0	1	0	0	0	0	1	0	0	0	1	0	1	1	1	0	1	1	0	1	0
	6 hours	1	0	0	0	1	2	0	0	0	1	0	0	0	1	0	1	1	0	0	1	1	0	1	1	0	2	2	0	1	1	1	1	0	1	0	1	0	1	0	1	1	1	1	2	1	0	1	1
	12 hours	1	0	0	1	1	2	1	0	0	2	1	0	0	1	0	1	1	0	0	2	2	1	2	2	1	3	2	0	2	1	2	2	1	1	1	1	0	2	0	2	2	3	2	4	1	2	2	1
	24 hours	1	0	0	1	1	2	1	0	0	2	1	0	0	1	0	1	1	0	1	2	4	3	4	2	3	3	2	1	2	3	2	2	1	1	1	2	0	2	0	2	6	5	5	7	3	2	5	4
	36 hours	2	1	0	1	1	2	1	1	0	2	1	1	0	2	1	1	1	0	1	2	5	3	5	3	3	4	4	2	2	4	3	2	2	3	1	2	1	3	0	2	7	6	6	8	4	2	5	5
	48 hours	2	1	1	1	2	2	1	1	0	2	2	1	0	2	1	1	2	0	1	3	5	3	6	3	4	5	4	3	2	5	3	3	4	3	1	3	1	3	1	2	8	7	7	9	5	3	6	6
[truncated: 42 more columns]

## Sheet: FREP2 Haemocyte Study
		Media Alone	Media Alone	Media Alone	Media Alone	Media Alone	Media Alone	Media Alone	Media Alone	Media Alone	Media Alone	M-line haemocytes	M-line haemocytes	M-line haemocytes	M-line haemocytes	M-line haemocytes	M-line haemocytes	M-line haemocytes	M-line haemocytes	M-line haemocytes	M-line haemocytes	M-line haemocytes+TEP	M-line haemocytes+TEP	M-line haemocytes+TEP	M-line haemocytes+TEP	M-line haemocytes+TEP	M-line haemocytes+TEP	M-line haemocytes+TEP	M-line haemocytes+TEP	M-line haemocytes+TEP	M-line haemocytes+TEP	M-line haemocytes+FREP2	M-line haemocytes+FREP2	M-line haemocytes+FREP2	M-line haemocytes+FREP2	M-line haemocytes+FREP2	M-line haemocytes+FREP2	M-line haemocytes+FREP2	M-line haemocytes+FREP2	M-line haemocytes+FREP2	M-line haemocytes+FREP2	M-line haemocytes+TEP+FREP2	M-line haemocytes+TEP+FREP2	M-line haemocytes+TEP+FREP2	M-line haemocytes+TEP+FREP2	M-line haemocytes+TEP+FREP2	M-line haemocytes+TEP+FREP2	M-line haemocytes+TEP+FREP2	M-line haemocytes+TEP+FREP2
Dead sporocysts/10	3 hours	0	0	0	0	0	0	0	0	0	0	0	0	0	1	0	1	0	0	0	1	0	0	1	1	0	0	1	0	0	0	0	0	0	0	0	0	0	0	0	1	0	1	0	2	0	0	0	0
	6 hours	0	0	0	0	1	1	0	0	0	1	0	0	0	1	0	1	1	0	0	1	1	0	1	1	0	1	1	0	1	0	1	0	1	0	0	2	0	0	0	2	0	1	0	2	0	0	1	0
	12 hours	1	0	2	1	1	1	1	0	0	1	1	0	0	1	0	1	1	0	0	2	4	2	3	2	1	1	2	1	2	3	1	0	1	0	0	2	0	1	0	2	1	2	0	3	0	1	1	1
	24 hours	1	0	2	1	1	2	2	0	1	1	1	0	0	1	0	1	1	0	1	2	5	3	4	2	2	3	3	2	3	3	1	0	1	0	1	3	1	2	0	3	3	2	3	3	1	3	3	4
	36 hours	2	1	2	1	1	2	2	0	1	1	1	1	0	2	1	1	1	0	1	2	6	4	6	3	2	3	4	2	4	4	2	2	2	1	1	3	1	2	0	3	3	4	4	4	3	5	4	4
	48 hours	2	1	2	1	2	2	2	1	1	2	2	1	0	2	1	1	2	0	1	3	7	4	7	4	4	4	5	4	5	6	2	2	2	2	1	4	1	3	1	3	5	7	5	8	5	5	5	6
[truncated: 42 more columns]

## Sheet: FREP3+FREP2 Study
		M-line haemocytes	M-line haemocytes	M-line haemocytes	M-line haemocytes	M-line haemocytes	M-line haemocytes	BS-90 haemocytes	BS-90 haemocytes	BS-90 haemocytes	BS-90 haemocytes	BS-90 haemocytes	BS-90 haemocytes	M-line haemocytes+FREP3+FREP2+TEP	M-line haemocytes+FREP3+FREP2+TEP	M-line haemocytes+FREP3+FREP2+TEP	M-line haemocytes+FREP3+FREP2+TEP	M-line haemocytes+FREP3+FREP2+TEP	M-line haemocytes+FREP3+FREP2+TEP	BS-90 haemocytes + anti-FREP3	BS-90 haemocytes + anti-FREP3	BS-90 haemocytes + anti-FREP3	BS-90 haemocytes + anti-FREP3	BS-90 haemocytes + anti-FREP3	BS-90 haemocytes + anti-FREP3	M-line haemocytes+FREP3+FREP2+TEP+anti-FREP3	M-line haemocytes+FREP3+FREP2+TEP+anti-FREP3	M-line haemocytes+FREP3+FREP2+TEP+anti-FREP3	M-line haemocytes+FREP3+FREP2+TEP+anti-FREP3	M-line haemocytes+FREP3+FREP2+TEP+anti-FREP3	M-line haemocytes+FREP3+FREP2+TEP+anti-FREP3	BS-90 haemocyte + pre-immunization IgG	BS-90 haemocyte + pre-immunization IgG	BS-90 haemocyte + pre-immunization IgG	BS-90 haemocyte + pre-immunization IgG	BS-90 haemocyte + pre-immunization IgG	BS-90 haemocyte + pre-immunization IgG	M-line haemocyte + pre-immunization IgG	M-line haemocyte + pre-immunization IgG	M-line haemocyte + pre-immunization IgG	M-line haemocyte + pre-immunization IgG	M-line haemocyte + pre-immunization IgG	M-line haemocyte + pre-immunization IgG
Dead sporocysts/10	3 hours	0	0	0	0	0	1	0	0	0	1	1	0	1	0	0	0	1	0	0	0	0	1	0	1	1	1	0	1	0	0	1	1	0	1	0	0	1	0	0	1	0	1
	6 hours	1	0	0	1	0	1	2	1	1	2	3	0	2	1	1	0	2	1	1	0	1	1	0	2	1	2	0	1	1	0	1	2	0	2	1	2	1	1	0	2	0	1
	12 hours	1	1	0	2	2	1	2	2	3	3	4	2	3	2	2	1	4	2	2	1	2	1	0	2	2	2	2	1	1	1	2	4	1	3	1	3	2	2	1	3	0	2
	24 hours	2	2	1	3	2	1	6	6	7	6	5	5	5	4	5	3	6	5	3	2	3	2	1	3	3	3	4	4	2	2	5	7	4	6	4	5	3	2	2	4	2	3
	36 hours	2	3	2	3	3	2	7	8	9	8	6	5	6	7	7	4	8	7	4	4	4	4	3	3	4	4	5	5	3	3	7	9	6	7	6	8	4	4	3	5	3	3
	48 hours	3	3	3	4	3	2	10	9	10	9	8	7	9	9	8	6	10	8	6	7	8	7	7	6	5	6	6	5	4	5	9	10	8	10	8	9	6	5	5	6	4	5
